# Supplementary material for: Activated gastric cancer-associated fibroblasts contribute to the malignant phenotype and 5-FU resistance via paracrine action in gastric cancer
Source: Springer Nature journal article supplement (doi:10.1186/s12935-018-0599-7), 2018-07-20
Supplement: MOESM3 [file 15966616]

SGC-7901+DMEM

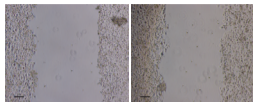

MKN-45+DMEM

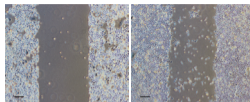

SGC-7901+CAFs

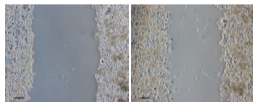

SGC-7901+CM

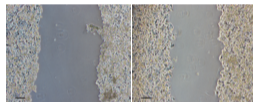

2916

2922

2923

0h

48h

0h

48h

MKN-45+CAFs

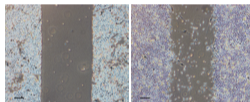

MKN-45+CM

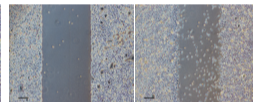

2916

2922

2923

0h

48h

0h

48h
